# Supplementary material for: FRET based ratiometric switch for selective sensing of Al3+ with bio-imaging in human peripheral blood mononuclear cells
Source: Royal Society of Chemistry journal article supplement (doi:10.1039/d0nj05546h), 2021-01-01
Supplement: d0nj05546h1.pdf [file d0nj05546h1.pdf]

## **Supporting Information**

### ***FRET based ratiometric switch for selective sensing of $Al^{3+}$ with bio-imaging in human peripheral blood mononuclear cells PBMCs***

**Sangita Das<sup>a\*</sup>, Partha Pratim Das<sup>b</sup>, James W. Walton<sup>a</sup>, Kakali Ghoshal<sup>c</sup>, Lakshman Patra<sup>d</sup> and Maitree Bhattacharyya<sup>c</sup>**

<sup>a</sup>. Durham University, Department of Chemistry, Durham, DH1 3LE, UK; Email: sangita.das@durham.ac.uk

<sup>b</sup>. Department of Earth System Sciences, Yonsei University, Seoul 120749, Korea.

<sup>c</sup>. Department of Biochemistry, University of Calcutta, 35 Ballygunge Circular Road, Kolkata 700019, India

<sup>d</sup>. Department of Chemistry, Jadavpur University, Jadavpur, Kolkata, India

## **CONTENTS**

- 1. UV/Vis study**
- 2. Fluorescence Study**
- 3. Calculation of FRET efficiency**
- 4. Truth table for INHIBIT Logic Gate and Combinatorial logic scheme of INHIBIT logic operations**
- 5.  $^1H$  NMR spectrum of Compound 1**
- 6.  $^{13}C$  MR spectrum of Compound 1**
- 7. Mass spectrum of Compound 1**
- 8.  $^1H$  NMR spectrum of TPRH**
- 9.  $^{13}C$  NMR spectrum of TPRH**
- 10. Mass spectrum of TPRH**
- 11. MS spectrum of the complex TPRH: $Al^{3+}$ )**
- 12.  $^1H$  NMR of TPRH and TPRH- $Al^{3+}$**
- 13. Comparison table**
- 14. References**

## 1. UV/vis Study

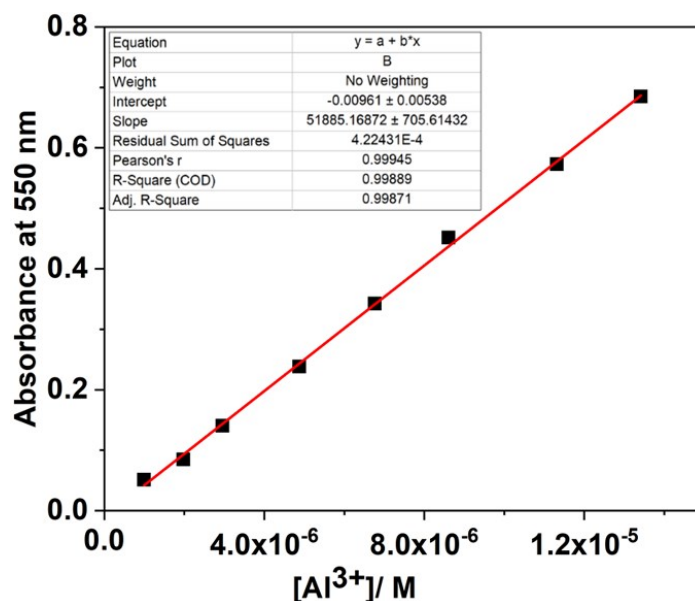

### Determination of Limit of Detection

**Figure S1:** Absorbance intensity at 550 nm of TPRH depending on the concentration of  $\text{Al}^{3+}$

The limit of detection (LOD) of TPRH towards  $\text{Al}^{3+}$  was determined from the following equation:  $\text{LOD} = K \times \text{Sb}_1 / S$ , where  $K = 3$ ;  $\text{Sb}_1$  is the standard deviation of the blank solution;  $S$  is the slope of the calibration curve.<sup>1</sup> From the data we find slope = 51900, and  $\text{Sb}_1$  value is 0.0006. The calculated Limit of Detection was calculated as  $3.5 \times 10^{-8}$  M.

### Determination of binding constant

The association constant was calculated, according to the Benesi-Hildebrand equation<sup>2</sup>:

$$1/(A-A_0) = 1/\{K(A_{\max}-A_0) [M^{x+}]^n\} + 1/[A_{\max}-A_0]$$

Here  $A_0$  and  $A$  are the absorbance of the probe at 550 nm in the absence of guest and in the presence of added guest,  $A_{\max}$  is absorbance in presence of added  $[M^{x+}]_{\max}$  and  $K_a$  is the association constant calculated for  $\text{Al}^{3+}$  binding. The association constant ( $K_a$ ) was determined from the slope of the straight line of the plot of  $1/(A-A_0)$  against  $1/[\text{Al}^{3+}]$ . The association constant for TPRH was found to be  $5.9 \times 10^5 \text{ M}^{-1}$ .

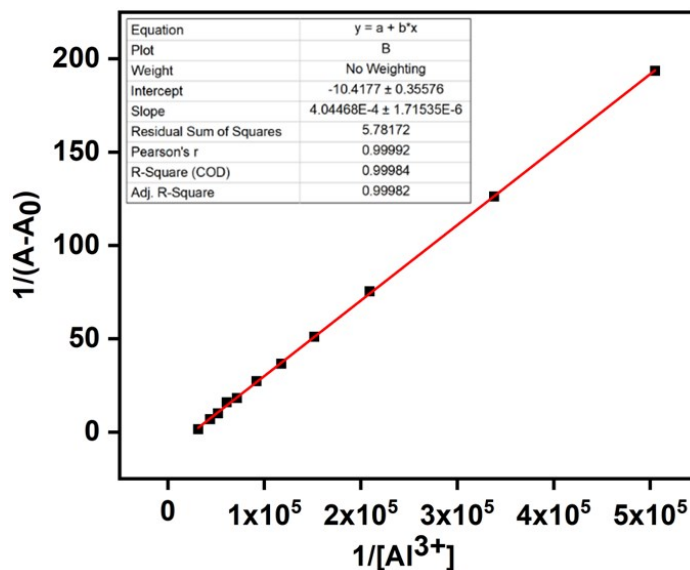

**Figure S2:** Benesi–Hildebrand plot from UV-Vis titration data of receptor (TPRH, 20  $\mu$ M) with  $Al^{3+}$ .

## 2. Fluorescence Study

### Determination of fluorescence Quantum Yield ( $\Phi$ ) of TPRH and its complex with $Al^{3+}$

To measure the quantum yields of TPRH and its complex with  $Al^{3+}$ , the absorbance of the compounds in methanol solution were recorded. The emission spectra were then recorded using the maximum excitation wavelengths, and the integrated areas of the fluorescence-corrected spectra were measured. The quantum yield of TPRH was then calculated by comparison with fluorescein ( $\Phi_s = 0.97$  in basic ethanol) as a reference. The quantum yield of TPRH- $Al^{3+}$  was calculated by comparison with rhodamine B ( $\Phi_s = 0.66$  in ethanol) as a reference. In each case the following equation was used:

$$\Phi_x = \Phi_s \times \left( \frac{I_x}{I_s} \right) \times \left( \frac{A_s}{A_x} \right) \times \left( \frac{n_x}{n_s} \right)^2$$

where,  $x$  and  $s$  indicate the unknown and standard solution, respectively,  $\Phi$  is the quantum yield,  $I$  is the integrated area under the fluorescence spectra,  $A$  is the absorbance and  $n$  is the refractive index of the solvent. The quantum yield calculated for TPRH using the above equation was 0.21. The quantum yield calculated for TPRH- $Al^{3+}$  using the above equation was 0.36.

## Linear responsive curve of TPRH

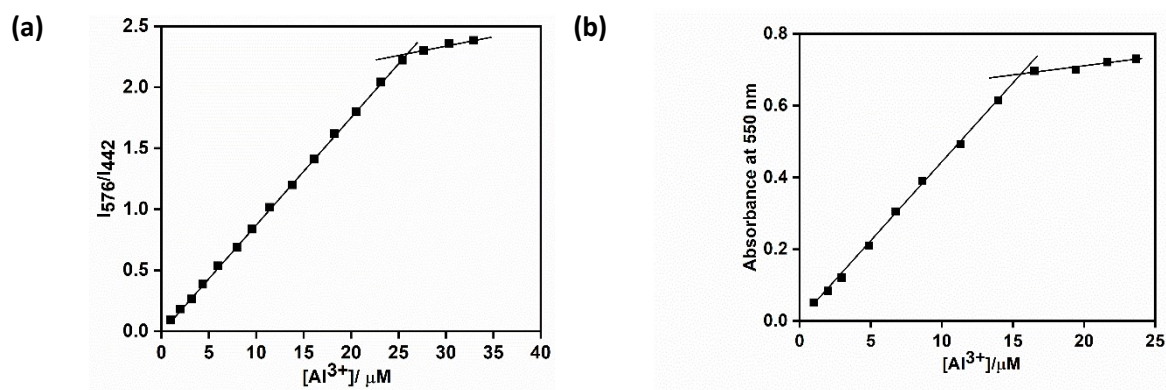

**Figure S3:** The response curve of (a) emission intensity ratio at  $I_{576}/I_{442}$  (in nm) and (b) absorbance at 550 nm of TPRH depending on the  $\text{Al}^{3+}$  concentration.

## Limit of detection determination

The detection limit was calculated based on the fluorescence titration. To determine the S/N ratio, the emission intensity of TPRH without  $\text{Al}^{3+}$  was measured 10 times and the average and standard deviation of blank measurements was determined. The limit of detection (LOD) of TPRH towards  $\text{Al}^{3+}$  was determined from the following equation:  $\text{LOD} = K \times \text{Sb}_1/S$ , where  $K = 3$ ;  $\text{Sb}_1$  is the standard deviation of the blank solution;  $S$  is the slope of the calibration curve.<sup>1</sup> For  $\text{Al}^{3+}$ :

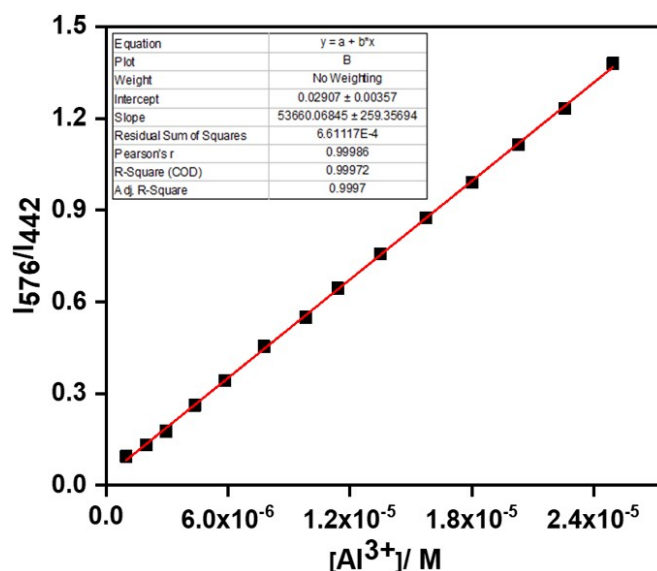

**Figure S4:** Emission intensity ratio  $I_{576}/I_{442}$  of TPRH depending on the concentration of  $\text{Al}^{3+}$

From the data we find slope = 53700, and  $\text{Sb}_1$  value is 0.0012. Thus, using the formula above the limit of detection is calculated as  $6.7 \times 10^{-8}$  M for TPRH.

## Job Plot

Stock solution of TPRH and  $\text{Al}^{3+}$  were prepared at  $2.0 \times 10^{-5}$  M in buffered  $\text{CH}_3\text{CN-H}_2\text{O}$  (1:1, v/v). The emission at 576 nm was monitored as the molar ratio was varied, but equal total molar quantities maintained. A Job plot was drawn by plotting  $\Delta I \cdot X_{\text{TPRH}}$  vs  $X_{\text{Al}}$  ( $\Delta I$  = change of intensity of the emission spectrum during titration and  $X_{\text{TPRH}}$  is the mole fraction of TPRH).

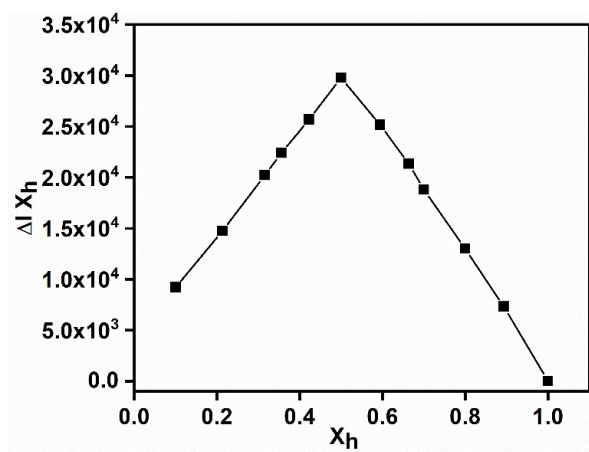

**Figure S5:** Job plot diagram of TPRH with  $\text{Al}^{3+}$  (where  $X_h$  is the mole fraction of TPRH and  $\Delta I$  indicates the change of emission at 576 nm).

## 3. Calculation of FRET efficiency

FRET efficiency ( $E$ ) of the probe (TPRH) was evaluated according to the following equation:

$$E = 1 - \frac{\Phi_D}{\Phi_D^0}$$

Where,  $\Phi_D$  and  $\Phi_D^0$  are the fluorescence quantum yields of the triphenylamine donor in the presence and absence of the rhodamine acceptor, respectively.  $\Phi_D$  was obtained by fluorescence measurement of TPRH in the presence of 1 equivalents of  $\text{Al}^{3+}$  (TPRH- $\text{Al}^{3+}$ ), and  $\Phi_D^0$  was obtained using the corresponding triphenylamine conjugated derivative (compound 1). Quantum yields of both triphenylamine conjugated derivative (compound 1) and TPRH- $\text{Al}^{3+}$  were measured in methanol solution using fluorescein ( $\Phi = 0.97$  in basic ethanol) as standard. Both the donor and the TPRH- $\text{Al}^{3+}$  were taken in 10  $\mu\text{M}$  concentration. The FRET efficiency of TPRH was calculated to be 44%.

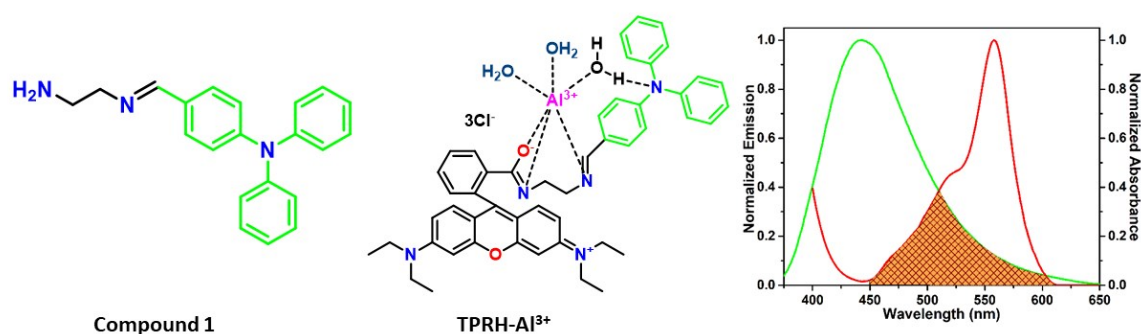

**Figure S6:** The spectral overlap of donor emission (green line) and acceptor absorbance (red line) of TPRH. Here, the donor is compound 1 and the acceptor is TPRH- $\text{Al}^{3+}$ . Spectra were recorded in MeOH/ $\text{H}_2\text{O}$  (1/4, v/v, pH = 7.2, 10 mM HEPES buffer solution),  $\lambda_{\text{ex}} = 350$  nm.

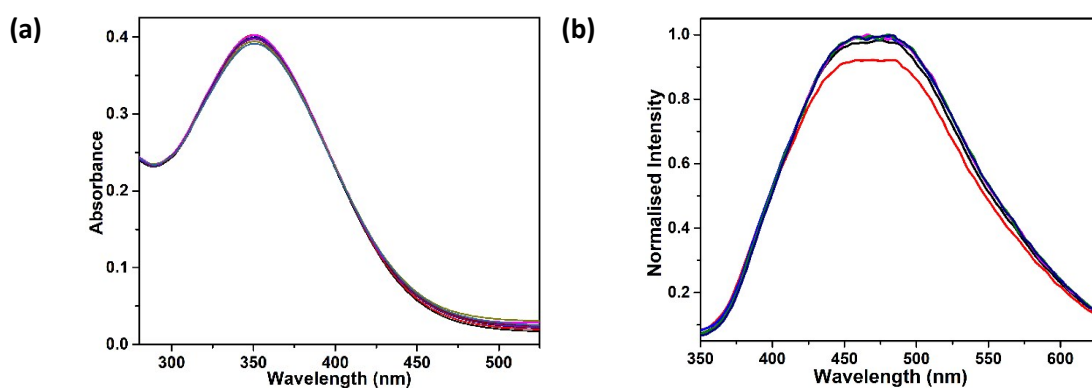

**Figure S7:** Change of (a) UV-vis and (b) emission spectra of compound 1 upon gradual addition of  $\text{Al}^{3+}$  (0 to 1.5 equivalents) ( $\lambda_{\text{ex}} = 340$  nm.).

Analogue of the rhodamine half of the molecule has already been reported by A. Lobnik *et.al* in Sensors 2018, 18, 1201; doi:10.3390/s18041201, and the probe is not sensitive towards  $\text{Al}^{3+}$ , which showed that the response is more than just the sum of the responses of each of the component halves.

#### 4. Truth table for INHIBIT Logic Gate

Table S1

| Input 1<br>(Al <sup>3+</sup> ) | Input 2<br>(EDTA) | Output (Emission intensity at<br>442 nm) | Output (Emission intensity at<br>576 nm) |
|--------------------------------|-------------------|------------------------------------------|------------------------------------------|
| 0                              | 0                 | 1                                        | 0                                        |
| 1                              | 0                 | 0                                        | 1                                        |
| 0                              | 1                 | 1                                        | 0                                        |
| 1                              | 1                 | 1                                        | 0                                        |

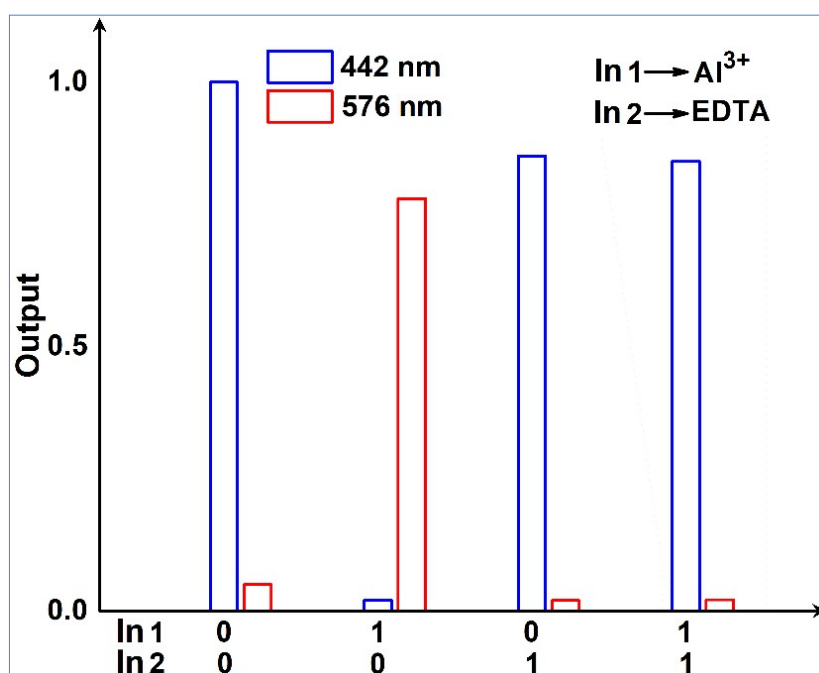

**Figure S8:** Combinatorial logic scheme of INHIBIT logic operations.

## 5. $^1\text{H}$ NMR spectrum of Compound 1

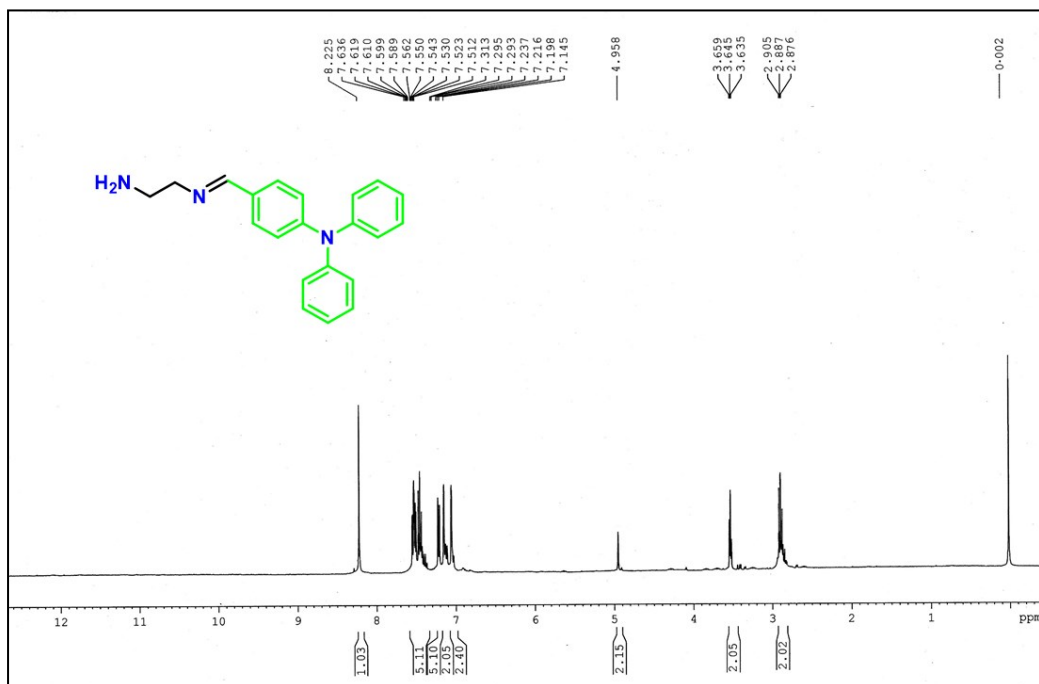

**Figure S9:**  $^1\text{H}$  NMR (400 MHz) spectrum of Compound 1 in  $\text{CDCl}_3$  (298 K).



## 6. $^{13}\text{C}$ NMR spectrum of Compound 1

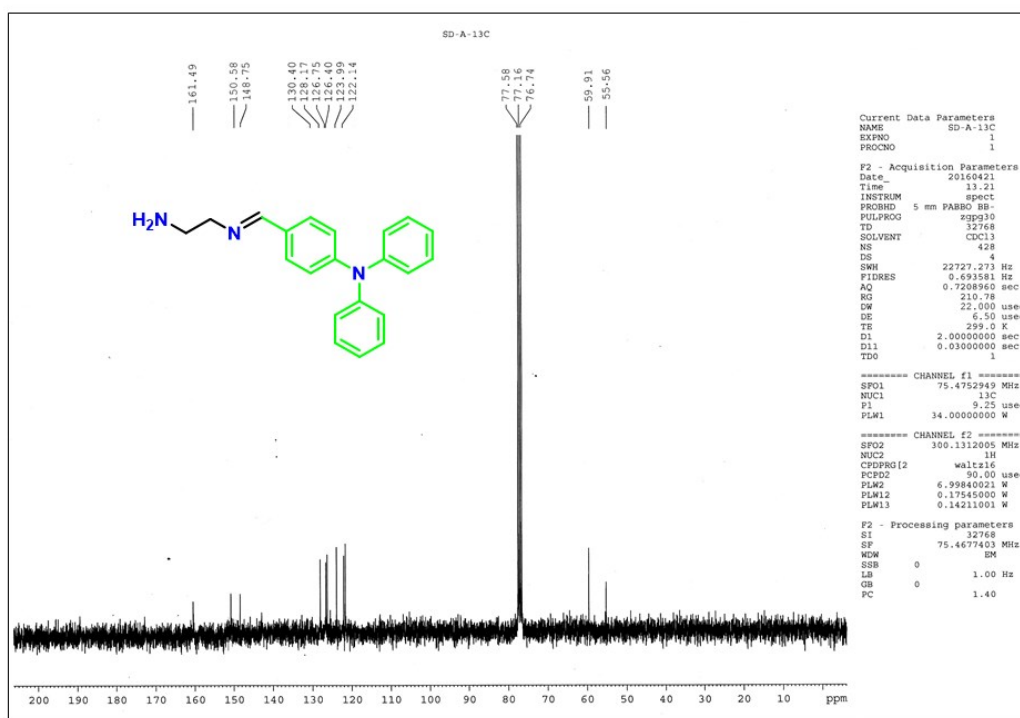

**Figure S10:**  $^{13}\text{C}$  NMR (75 MHz) spectrum of Compound 1 in  $\text{CDCl}_3$  (298 K).

## 7. Mass Spectrum of Compound 1

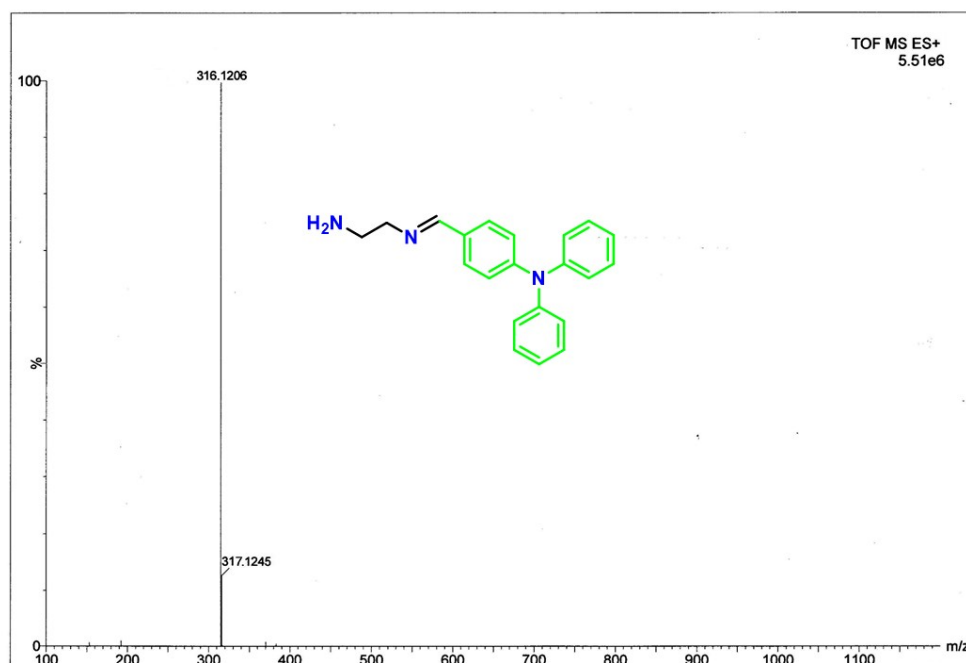

**Figure S11:** MS of Compound 1 (positive ESI mode).  $m/z$  316.12; calcd for  $\text{C}_{21}\text{H}_{22}\text{N}_3$   $[\text{M}+\text{H}]^+$  316.18.

## 8. $^1\text{H}$ NMR spectrum of TPRH

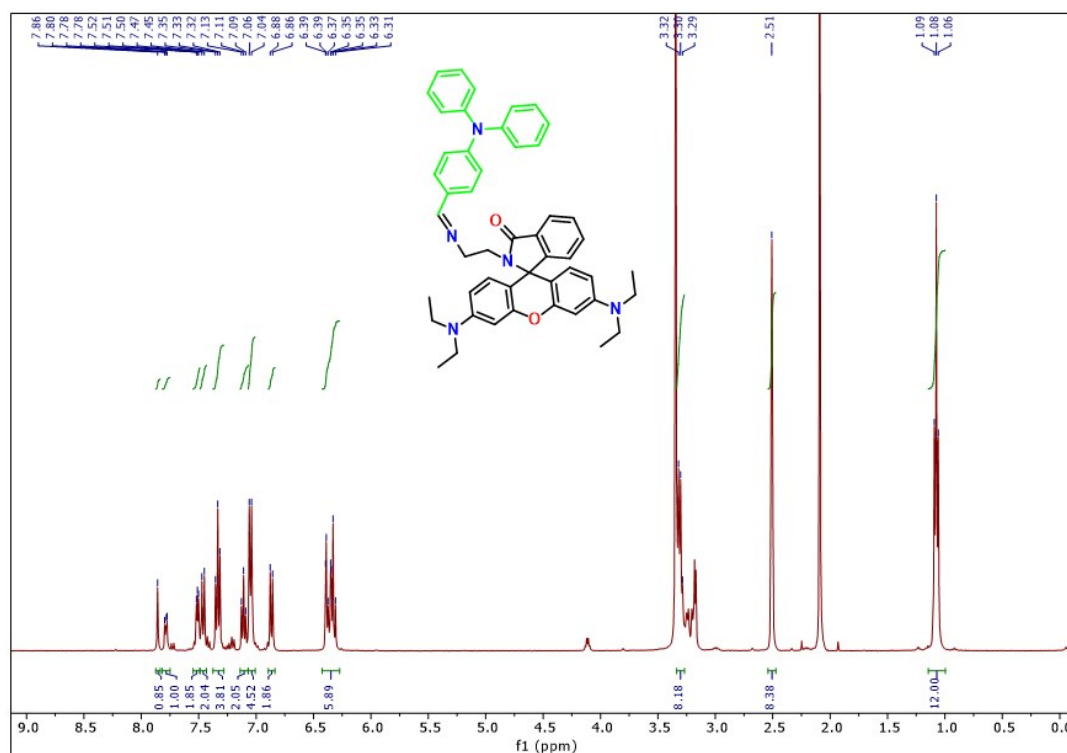

**Figure S12:**  $^1\text{H}$  NMR (400 MHz) spectrum of TPRH in  $\text{d}_6\text{-DMSO}$  (298 K)

## 9. $^{13}\text{C}$ MR spectrum of TPRH

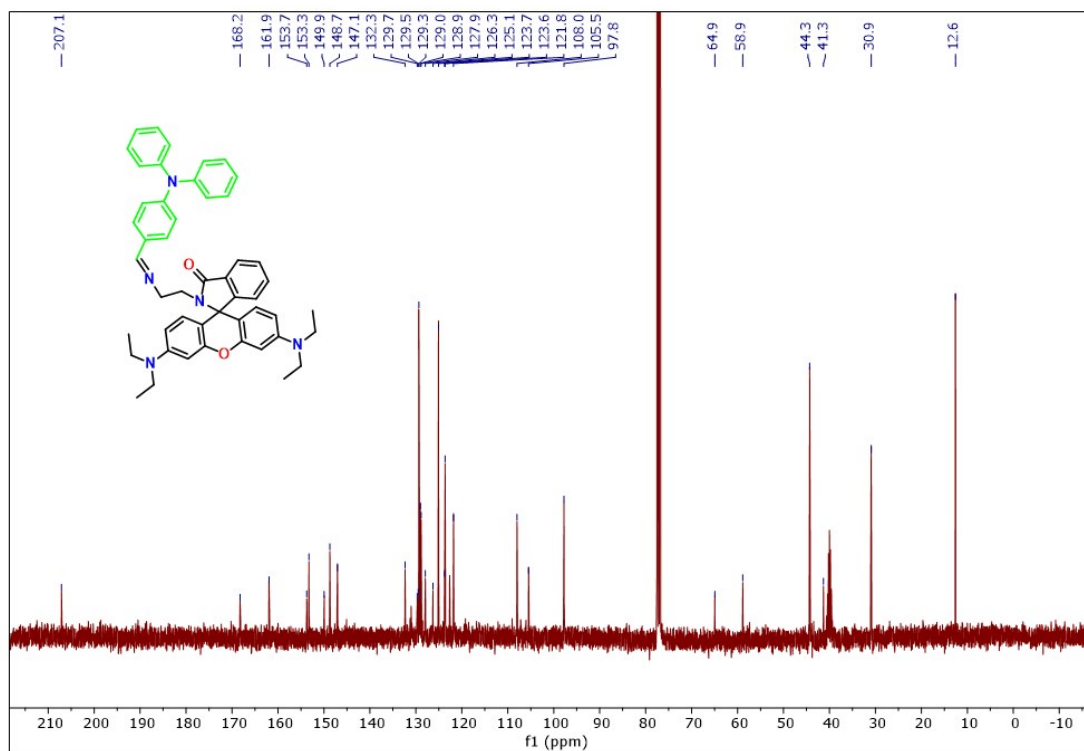

**Figure S13:**  $^{13}\text{C}$  NMR (100 MHz) spectrum of TPRH in  $\text{CDCl}_3$  (298 K).

**Fig**

## 10. Mass spectrum of TPRH

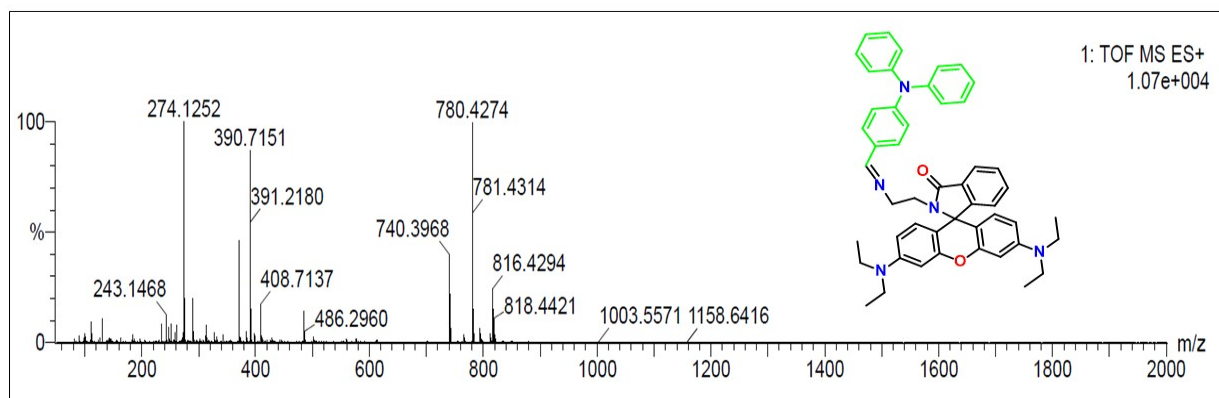

**Figure S14:** HRMS of TPRH (positive ESI mode). HRMS (ESI, positive mode): ( $m/z$ ) found: 740.3968; calcd for  $C_{49}H_{49}N_5O_2$   $[M+H]^+$  740.3959.

## 11. Mass spectrum of the complex TPRH: $Al^{3+}$

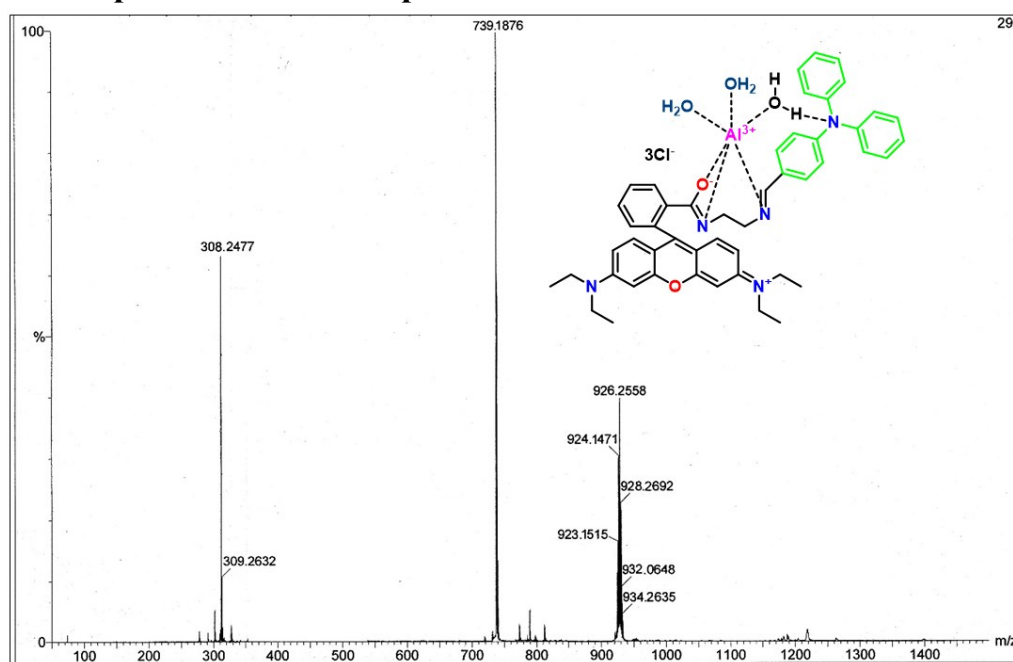

**Figure S15:** MS spectrum of the TPRH with  $Al^{3+}$  (positive ESI mode).  $m/z$  926.26,  $[TPRH + Al^{3+} + 3H_2O + 3^{35}Cl^- + H^+]^+$  requires 926.31.

## 12. $^1\text{H}$ NMR of TPRH and TPRH- $\text{Al}^{3+}$

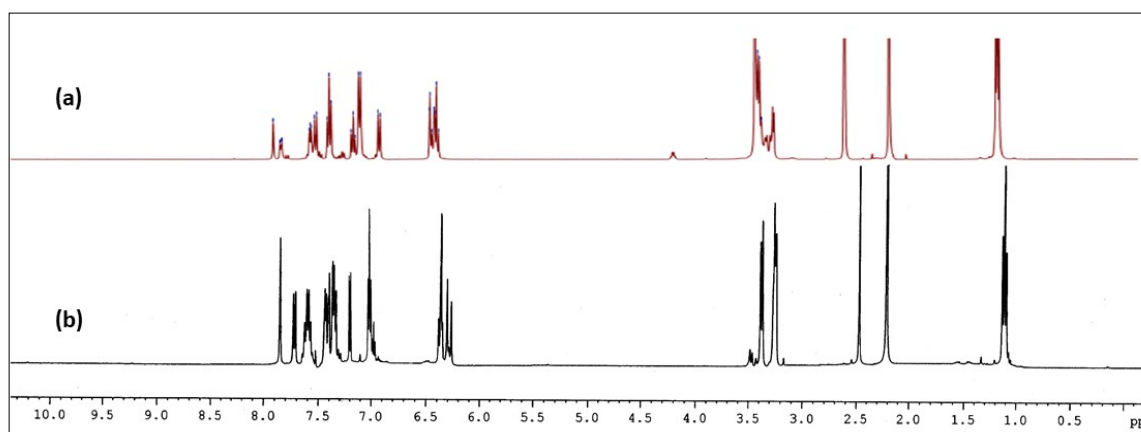

**Figure S16:** Partial  $^1\text{H}$  NMR (400 MHz) spectra of (a) TPRH and (b) TPRH +  $\text{Al}^{3+}$  in  $\text{d}_6$ -DMSO.  $[\text{TPRH}] = 3.12 \times 10^{-3} \text{ M}$ ;  $[\text{Al}^{3+}] = 6.24 \times 10^{-3} \text{ M}$  (298 K).

## 13. Comparison Table

**Table S2**

| Sr. No | Fluorophore Used                        | Ratiometric Fluorescence Change | Detection Limit                                                                                                             | Bioimaging Studies | Selective towards                                 | Mechanism                              | Reference                                     |
|--------|-----------------------------------------|---------------------------------|-----------------------------------------------------------------------------------------------------------------------------|--------------------|---------------------------------------------------|----------------------------------------|-----------------------------------------------|
| 1.     | Rhodamine–naphthalene                   | Yes                             | $8.06 \times 10^{-8} \text{ M}$                                                                                             | No                 | $\text{Al}^{3+}$                                  | FRET                                   | Tetrahedron Letters 2016, 57, 1935–1939       |
| 2.     | Rhodamine-linked pyridyl thiourea       | Yes                             | $1.08 \times 10^{-4} \text{ M}$ and $1.27 \times 10^{-6} \text{ M}$ for $\text{F}^-$ and $\text{Al}^{3+}$ ions respectively | Yes                | $\text{F}^-$ , $\text{Al}^{3+}$ and $\text{Ag}^+$ | FRET                                   | Supramolecular Chemistry, 2015, 27, , 490–500 |
| 3.     | Rhodamine-diformyl p-cresol             | Yes                             | $5 \times 10^{-9} \text{ M}$                                                                                                | Yes                | $\text{Al}^{3+}$                                  | PET–CHEF and FRET                      | Inorg. Chem. 2013, 52, 3627–3633              |
| 4.     | N-salicylidenehydrazide ligands- furan- | No                              | $3.1 \times 10^{-9} \text{ M}$                                                                                              | No                 | $\text{Al}^{3+}$ and $\text{Zn}^{2+}$             | Chelation-enhanced fluorescence (CHEF) | ACS Sens. 2016, 1, 144–150                    |
| 5.     | Antipyrine Schiff bases                 | No                              | $4.97 \times 10^{-7} \text{ M}$<br>$9.60 \times 10^{-7} \text{ M}$                                                          | No                 | $\text{Al}^{3+}$ and $\text{Cr}^{3+}$             | PET                                    | Sensors and Actuators B,                      |

|    |                                       |     |                                                                                                                            |     |                                                                 |                                                             |                                                         |
|----|---------------------------------------|-----|----------------------------------------------------------------------------------------------------------------------------|-----|-----------------------------------------------------------------|-------------------------------------------------------------|---------------------------------------------------------|
|    |                                       |     | M<br>Respectively<br>Al <sup>3+</sup> and<br>Cr <sup>3+</sup>                                                              |     |                                                                 |                                                             | 2016, 231, 847–<br>859                                  |
| 6. | 2,5-diarylthiazolo[5,4-<br>d]thiazole | No  | Not given                                                                                                                  | No  | Cr <sup>3+</sup><br>and Al <sup>3+</sup>                        | Off-On<br>mechanism                                         | Dyes and<br>Pigments 2012,<br>94, 423-426               |
| 7. | Naphthaldehyde<br>semicarbazone       | No  | $6.75 \times 10^{-8}$<br>M (Al <sup>3+</sup> ) and<br>$7.89 \times 10^{-7}$ M<br>(F <sup>-</sup> )                         | Yes | Cascade<br>sensing<br>of Al <sup>3+</sup><br>and F <sup>-</sup> | CHEF                                                        | RSC Adv.,<br>2020, 10,<br>21629–21635                   |
| 8. | Benzothiazol–furan                    | No  | 6.47 nM                                                                                                                    | Yes | Al <sup>3+</sup>                                                | PET and<br>ESIPT                                            | New J. Chem.,<br>2020, 44,<br>12079-12089               |
| 9. | Anthracene-<br>pyridinecarboxaldehyde | No  | $(4.338 \pm 0.00032) \times 10^{-11}$ (Al <sup>3+</sup> )<br><br>$(5.865 \pm 0.00011) \times 10^{-11}$ (Al <sup>3+</sup> ) | No  | Cr <sup>3+</sup><br>and Al <sup>3+</sup>                        | CHEF                                                        | New J. Chem.,<br>2020, 44, 12692-<br>12703              |
| 10 | Antipyrine                            | No  | 1.05 nM<br>for Al <sup>3+</sup> ,<br>2.35 nM for<br>Zn <sup>2+</sup>                                                       | No  | Al <sup>3+</sup> and<br>Zn <sup>2+</sup>                        | Aggregation<br>induced<br>emission<br>enhancement<br>(AIEE) | Photochem.<br>Photobiol. Sci.,<br>2020, 19, 681-<br>694 |
| 11 | Rhodamine-thiophene                   | No  | $4.17 \times 10^{-6}$<br>M                                                                                                 | No  | Al <sup>3+</sup>                                                | Off-On<br>mechanism                                         | Luminescence<br>2016; 31, 851–<br>855                   |
| 12 | Rhodamine-<br>aminophenol             | No  | 0.16 $\mu$ M                                                                                                               | Yes | Al <sup>3+</sup>                                                | Off-On<br>mechanism                                         | RSC Adv.,<br>2018, 8, 31106–<br>31112                   |
| 13 | Thiophene-based<br>rhodamine          | No  | Fe <sup>3+</sup> and<br>Al <sup>3+</sup><br>5 and 6 $\mu$ M,<br>respectively                                               | Yes | Fe(III)<br>and Al <sup>3+</sup>                                 | Off-On<br>mechanism                                         | 10.1007/s00216-<br>017-0490-8                           |
| 14 | Naphthalimide                         | Yes | $2.9 \times 10^{-7}$ M                                                                                                     | Yes | Al <sup>3+</sup>                                                | Intramolecular<br>charge<br>transfer (ICT)                  | New J. Chem.,<br>2020, 44, 3261-<br>3267                |
| 15 | Triphenylamine and<br>rhodamine-B     | Yes | $6.7 \times 10^{-8}$<br>M                                                                                                  | Yes | Al <sup>3+</sup>                                                | FRET                                                        | Present Work                                            |

#### 14. References

1. (a) M. Shortreed, R. Kopelman, M. Kuhn and B. Hoyland, *Anal. Chem.*, 1996, **68**, 1414; (b) W. Lin, L. Yuan, Z. Cao, Y. Feng and L. Long, *Chem. Eur. J.*, 2009, **15**, 5096.
2. (a) H. A. Benesi and J. H. Hildebrand, *J. Am. Chem. Soc.*, 1949, **71**, 2703; (b) D. C. Carter and J. X. Ho, *Adv. Protein Chem.*, 1994, **45**, 153; (c) A. Mallick and N. Chattopadhyay, *Photochem. Photobiol.*, 2005, **81**, 419; (d) I. Ravikumar, B. N. Ahamed and P. Ghosh, *Tetrahedron*, 2007, **63**, 12940.
